# Supplementary material for: Genomic Diversity of NDM-Producing Klebsiella Species from Brazil, 2013–2022
Source: MDPI journal article supplement (doi:10.3390/antibiotics11101395), 2022-10-12
Supplement: s1 [file s1]

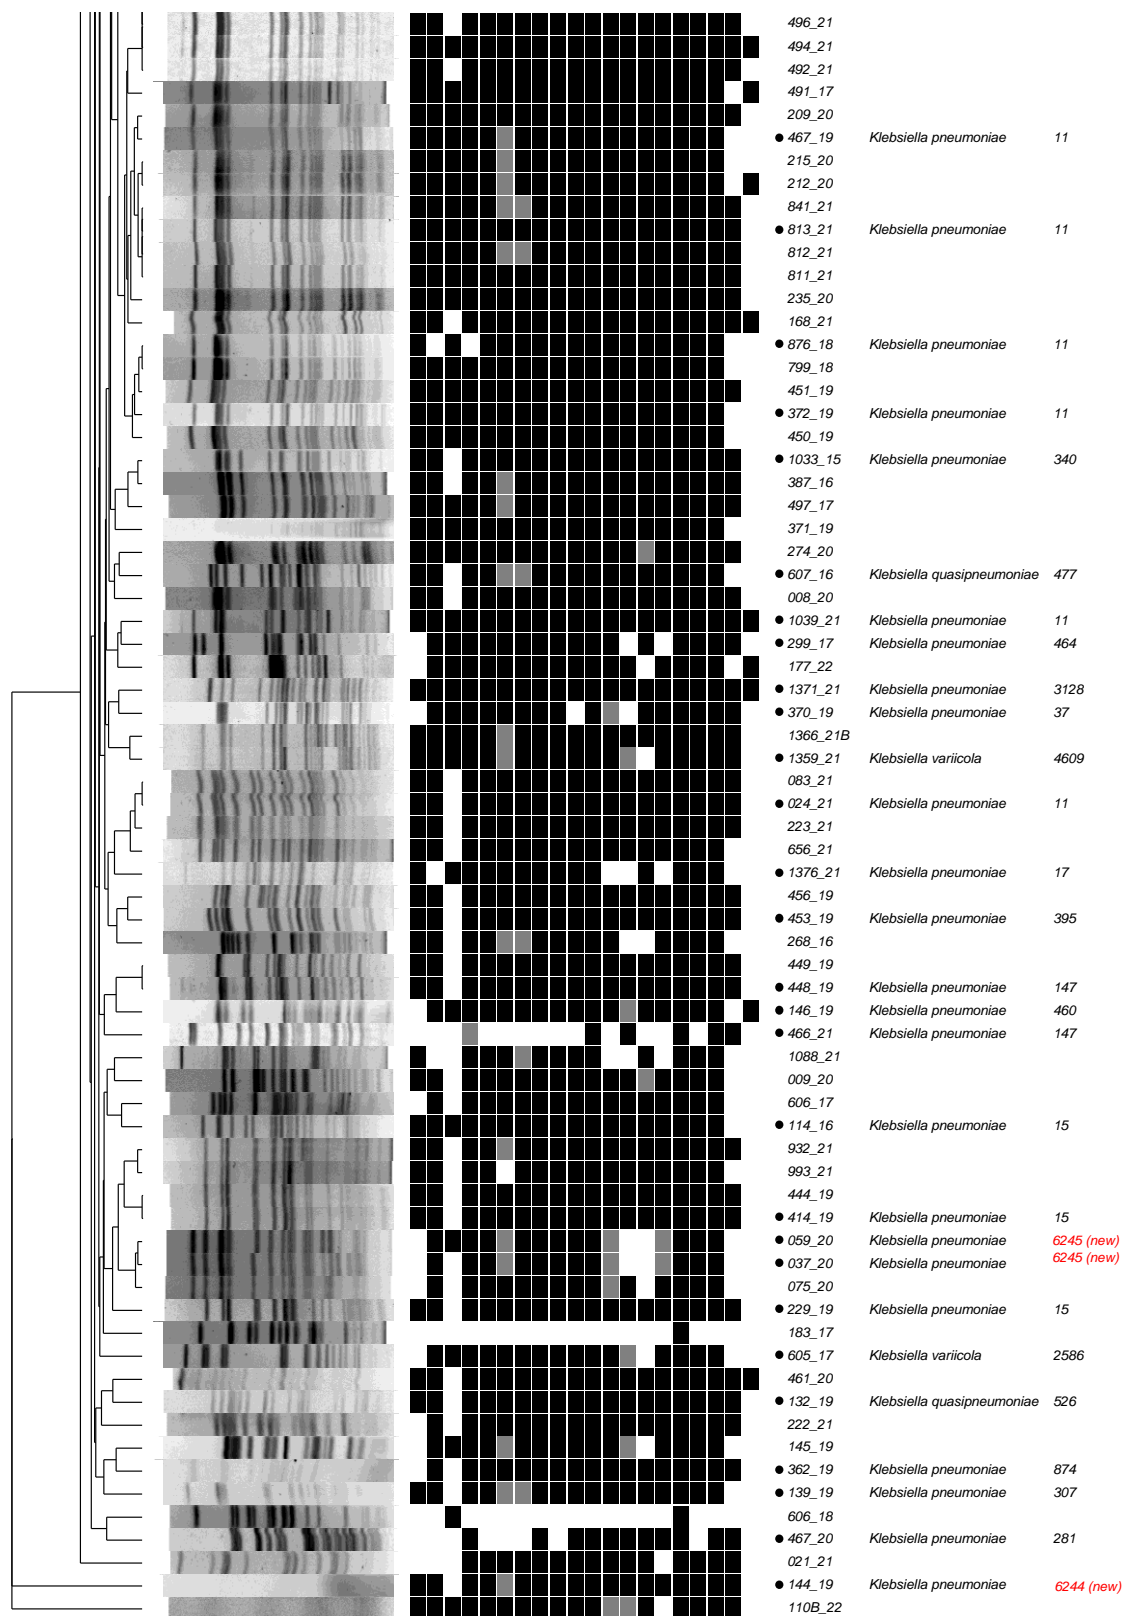

## Legend

AK, amikacin; CN, gentamicin, TOB, tobramycin; CIP, ciprofloxacin; LEV, levofloxacin; SXT, trimethoprim-sulfamethoxazole; AMP, ampicillin; FEP, cefepime; CTX, cefotaxime; CAZ, ceftazidime; ETP, ertapenem; IMP, imipenem; MEM, meropenem; FOX, ceftazidime; AMC, amoxicillin-clavulanic acid; SAM, ampicillin-sulbactam; TZIP, piperacillin-tazobactam; ATM, aztreonam; C, chloramphenicol; PB, polymyxin B.
