# Supplementary material for: Genomic Diversity of NDM-Producing Klebsiella Species from Brazil, 2013–2022
Source: MDPI journal article supplement (doi:10.3390/antibiotics11101395), 2022-10-12
Supplement: s1 [file s1]

Table S1. Distribution of NDM-producing *Klebsiella* from Brazil, according to State and Administrative Region.

| Region/State   | Total<br>(n) | %    | Sequenced<br>(n) | %    | Sequence types found *                                                                                                                               |
|----------------|--------------|------|------------------|------|------------------------------------------------------------------------------------------------------------------------------------------------------|
| Southeast      | 109          | 80.7 | 43               | 79.6 | 11 (12), 15 (3), 16, 17, 37, 43, 128, 147, 196 (3), 281, 283 (2), 336, 367, 395, 418, 464, 485, 534, 874, 1040 (2), 1456, 2586, 3128, 4609, 6245 (2) |
| Rio de Janeiro | 1            | 0.7  | 1                | 1.9  | 464                                                                                                                                                  |
| São Paulo      | 107          | 79.3 | 41               | 75.9 | 11 (12), 15 (3), 16, 17, 37, 43, 128, 147, 196 (3), 281, 283 (2), 336, 367, 395, 418, 485, 534, 1040 (2), 1456, 2586, 3128, 4609, 6245 (2)           |
| Minas Gerais   | 1            | 0.7  | 1                | 1.9  | 874                                                                                                                                                  |
| Midwest        | 1            | 0.7  | 0                | 0    | -                                                                                                                                                    |
| Goiânia        | 1            | 0.7  | 0                | 0    | -                                                                                                                                                    |
| Northeast      | 4            | 3.0  | 2                | 3.7  | 340, 477                                                                                                                                             |
| Alagoas        | 1            | 0.7  | 1                | 1.9  | 477                                                                                                                                                  |
| Pernambuco     | 3            | 2.2  | 1                | 1.9  | 340                                                                                                                                                  |
| North          | 21           | 15.6 | 9                | 16.7 | 147, 307, 392 (3), 460, 526, 1822, 6244                                                                                                              |
| Pará           | 8            | 5.9  | 2                | 3.7  | 147, 1822                                                                                                                                            |
| Tocantins      | 13           | 9.6  | 7                | 13.0 | 307, 392 (3), 460, 526, 6244                                                                                                                         |
| Total          | 135          | 100  | 54               | 100  |                                                                                                                                                      |

\* In parenthesis are indicated the number of isolates, except when it was 1 (and it was omitted).
